# Supplementary material for: Impact of Attitudes and Rurality on Veterans’ Use of Veterans Health Administration Mental Health Services
Source: Atypon-hosted journal article supplement (doi:10.1176/appi.ps.201900275), 2021-03-11
Supplement: appi.ps.201900275.ds001.pdf [file appi.ps.201900275.ds001.pdf]

Comparison of Known Characteristics of Veterans Who Participated, Refused Participation or Could Not Be Contacted\*

|                                                       | Study Participation Status |      |                   |      |                             |      | P     |
|-------------------------------------------------------|----------------------------|------|-------------------|------|-----------------------------|------|-------|
|                                                       | Participant<br>N=752       |      | Refusal<br>N=1513 |      | Unable to Contact<br>N=1044 |      |       |
| Characteristics                                       | N                          | %    | N                 | %    | N                           | %    |       |
| <b><i>Stratification Variables**</i></b>              |                            |      |                   |      |                             |      |       |
| Gender (Female)                                       | 188                        | 25   | 258               | 17   | 222                         | 21   | <.001 |
| <i>VISN</i>                                           |                            |      |                   |      |                             |      |       |
| VISN 1                                                | 182                        | 24   | 439               | 29   | 289                         | 28   | .149  |
| VISN 16                                               | 104                        | 26   | 333               | 22   | 235                         | 23   |       |
| VISN 19                                               | 192                        | 26   | 382               | 25   | 249                         | 24   |       |
| VISN 23                                               | 194                        | 24   | 359               | 24   | 271                         | 26   |       |
| Distance in miles to the nearest VAMC (mean $\pm$ SD) | 43.6                       | 43.6 | 41.3              | 41.3 | 38.4                        | 39.8 | .029  |
| <b><i>Other Characteristics</i></b>                   |                            |      |                   |      |                             |      |       |
| <i>Race***</i>                                        |                            |      |                   |      |                             |      |       |
| White                                                 | 574                        | 76   | 1169              | 77   | 764                         | 73   | .072  |
| Black                                                 | 103                        | 14   | 168               | 11   | 158                         | 15   |       |
| Other                                                 | 21                         | 3    | 43                | 3    | 34                          | 3    |       |
| Missing                                               | 54                         | 7    | 133               | 9    | 88                          | 8    |       |
| Age (mean $\pm$ SD)                                   | 51.4                       | 12.5 | 53.4              | 13.5 | 46.1                        | 14.0 | <.001 |

\*Proportions were compared among groups using chi-square tests; means were compared using ANOVA.

\*\*Sampling weights were used in multivariable analyses to adjust for over- and non-proportional sampling.

\*\*\*The distribution of participants by race in this table differs from that in Table 2 both due to our not having administrative (CDW) data on Hispanic ethnicity and because the data in Table 2 are based on participants' self-report during the telephone interview.

Odds Ratios for Association of Attitudes with No Post-Interview Use of VA Mental Healthcare Adjusted for Rurality (Distance + Place Identity), Personal Characteristics, Need and Structural Barriers, Stratified by Gender

| <b>Measures</b>                            | <b>Male</b> |               |          |          | <b>Female</b> |               |          |          |
|--------------------------------------------|-------------|---------------|----------|----------|---------------|---------------|----------|----------|
|                                            | <b>OR</b>   | <b>95% CI</b> | <b>Z</b> | <b>P</b> | <b>OR</b>     | <b>95% CI</b> | <b>Z</b> | <b>P</b> |
| <b>Attitude Indicators</b>                 |             |               |          |          |               |               |          |          |
| Mistrust of others                         | 1.07        | 0.99-1.15     | 1.71     | .088     | 1.03          | 0.94-1.23     | 0.65     | .516     |
| Self-stigma                                | 0.95        | 0.89-1.01     | -1.54    | .123     | 1.03          | 0.97-1.10     | 0.99     | .325     |
| Stoicism – physical                        | 0.94        | 0.88-0.99     | -2.00    | .045     | 1.06          | 0.99-1.14     | 1.63     | .102     |
| Stoicism – emotional                       | 1.17        | 1.08-1.26     | 4.08     | <.0001   | 0.99          | 0.91-1.08     | -0.21    | .836     |
| <i>Trust in VA for MH care</i>             |             |               |          |          |               |               |          |          |
| VA only                                    | 0.84        | 0.26-2.74     | -0.29    | .768     | 0.62          | 0.17-2.35     | -0.70    | .486     |
| Both                                       | 1.27        | 0.41-4.00     | 0.42     | .678     | 1.36          | 0.40-4.57     | 0.50     | .620     |
| Non-VA only                                | 1.21        | 0.33-4.42     | -0.28    | .776     | 0.99          | 0.24-4.11     | -0.01    | .992     |
| Emotional problems self-resolve            | 1.52        | 0.73-3.19     | 1.12     | .263     | 2.27          | 0.98-5.29     | 1.91     | .056     |
| Belief in efficacy of MH care              | 0.99        | 0.94-1.05     | -0.24    | .806     | 0.96          | 0.89-1.03     | -1.23    | .219     |
| Belief in efficacy of religious counseling | 1.01        | 0.92-1.11     | 0.26     | .793     | 1.20          | 1.07-1.35     | 3.16     | .002     |
| <b>Rurality Indicators</b>                 |             |               |          |          |               |               |          |          |
| Distance (in miles)                        | 1.005       | 1.00-1.01     | 1.70     | .089     | 1.003         | 1.00-1.01     | 1.17     | .241     |
| <i>Place Identity</i>                      |             |               |          |          |               |               |          |          |
| Rural                                      | 0.85        | 0.48-1.51     | -0.55    | .581     | 0.91          | 0.47-1.74     | -0.29    | .769     |
| Suburban                                   | 0.73        | 0.39-1.35     | -1.01    | .314     | 0.46          | 0.22-0.94     | -2.14    | .032     |

Reference group = "any use" = 0; comparison group = "no use" = 1

Trust in VA for MH care reference group = neither; Place Identity reference group = urban
